# Supplementary material
Source: Springer Nature journal article supplement (https://www.springermedizin.de/resource/supplementary/13098_2009_27_MOESM2_ESM.pdf/9670354)

**A.**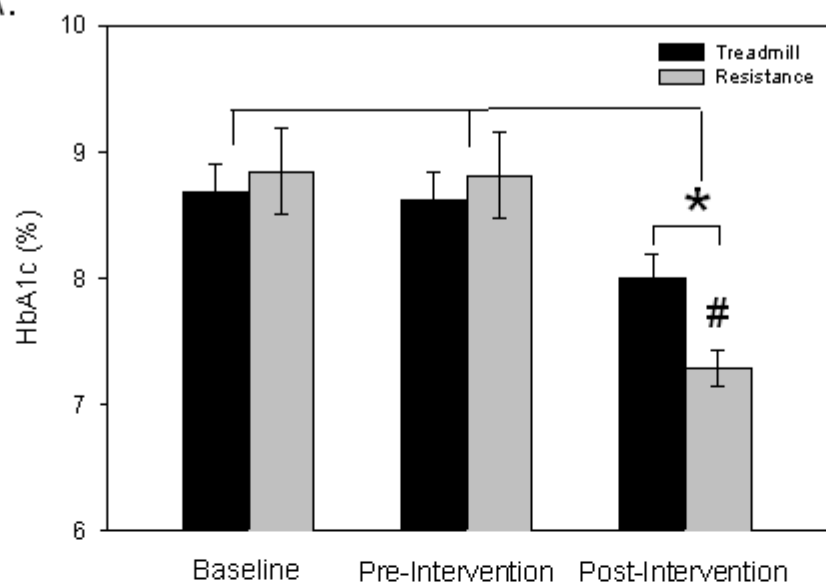**B.**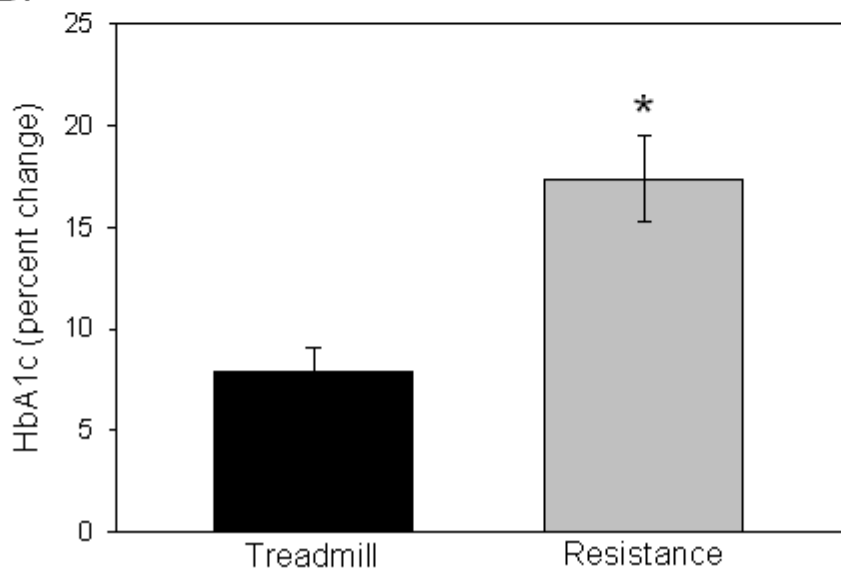

Supplement: MOESM2 [file 9670354]
